# Supplementary material for: Diorganodiselenides and zinc(ii) organoselenolates containing (imino)aryl groups of type 2-(RNCH)C6H4
Source: Royal Society of Chemistry journal article supplement (doi:10.1039/c2dt30098b), 2012-01-01
Supplement: c2dt30098b.pdf [file c2dt30098b.pdf]

## Electronic Supplementary Information

### **Diorganodiselenides and zinc(II) organoselenolates containing (imino)aryl groups of type 2-(RN=CH)C<sub>6</sub>H<sub>4</sub>**

**Alpar Pöllnitz,<sup>a</sup> Cristian Silvestru,<sup>a</sup> Jean-Francois Carpentier<sup>b</sup> and Anca Silvestru<sup>\*a</sup>**

<sup>a</sup> Facultatea de Chimie si Inginerie Chimica, Universitatea Babes-Bolyai, RO-400028, Cluj-Napoca, Romania. Fax: (+40) 264-590818; Tel: (+40) 264-593833; E-mail: [ancas@chem.ubbcluj.ro](mailto:ancas@chem.ubbcluj.ro)

<sup>b</sup> Catalysis and Organometallics, UMR CNRS 6226-Université de Rennes 1, Campus de Beaulieu, 35042 Rennes Cedex, France.

### Numbering schemes for NMR resonance assignments

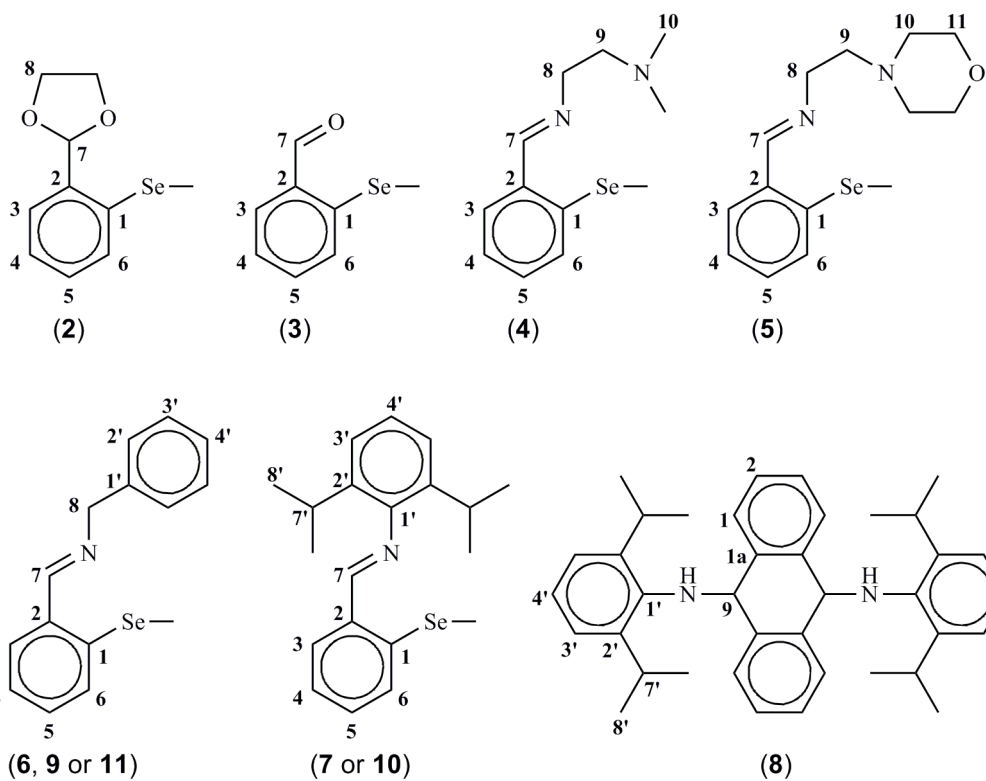

## NMR studies

$^1\text{H}$  NMR was used to monitor the reaction between aldehyde [2-((O)CH) $\text{C}_6\text{H}_4$ ] $_2\text{Se}_2$  (**3**) and 2,6-diisopropylaniline until condensation was achieved. Figure S1 shows the  $^1\text{H}$  NMR spectra of the products of this reaction after 24 h of refluxing in toluene using a Dean-Stark trap (up) and after two hours of refluxing in acetonitrile (down). When this reaction was carried out the presence of the characteristic resonance for the  $-\text{CHO}$  proton of the aldehyde ( $\delta$  10.16 ppm) and the resonance at  $\delta$  3.77 ppm corresponding to the  $-\text{NH}_2$  protons of the 2,6-diisopropylaniline show that no reaction took place. When the reaction was carried out in acetonitrile the absence of the signals corresponding to the protons of the  $-\text{CHO}$  and the  $-\text{NH}_2$  groups, respectively, indicates full conversion of the starting materials to the desired imine **7** with a characteristic  $-\text{CH}=\text{N}-$  resonance at  $\delta$  8.52 ppm.

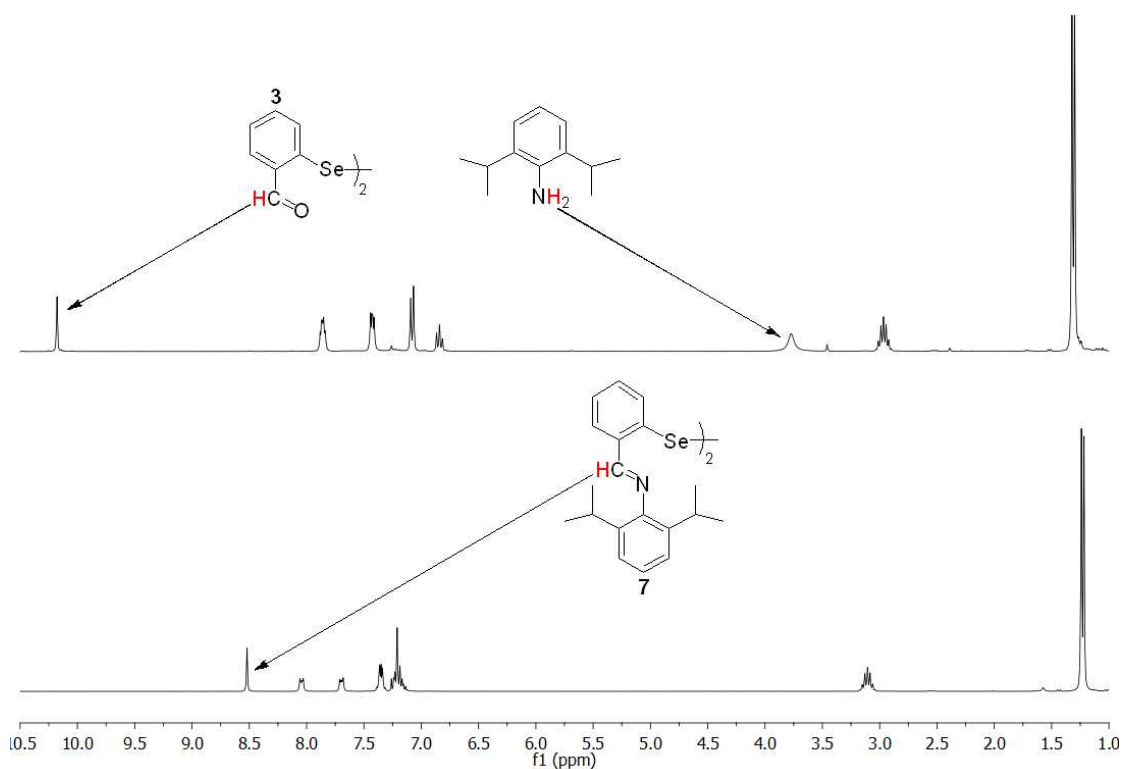

**Figure S1.**  $^1\text{H}$  NMR ( $\text{CDCl}_3$ , 300 MHz, r.t.) spectra of the reaction products of **3** with 2,6-diisopropylaniline in toluene, using a Dean-Stark trap, in the presence of TosOH (up), and in acetonitrile, without catalyst (down).

[2-(PhCH<sub>2</sub>NCH)C<sub>6</sub>H<sub>4</sub>]<sub>2</sub>Se<sub>2</sub> (**6**)

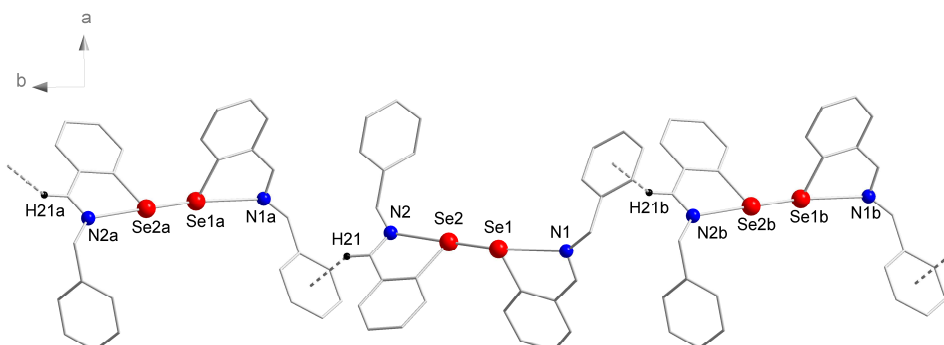

**Figure S2.** View of a chain polymer based on C–H<sub>aryl</sub>··· $\pi$  (Ph<sub>centroid</sub>) contacts between molecules in the crystal of **6** (only hydrogen atoms involved in intermolecular contacts are shown) [symmetry equivalent atoms (1 – x, 0.5 + y, 1.5 – z) and (1 – x, –0.5 + y, 1.5 – z) are given by “a” and “b”, respectively].

- intermolecular distance  $\text{C}(21)\text{--H}(21)\cdots\text{Ph}_{\text{centroid}}$  2.96 Å
- no further contacts between parallel chains.

**9,10-(2',6'-<sup>i</sup>Pr<sub>2</sub>C<sub>6</sub>H<sub>3</sub>NH)<sub>2</sub>C<sub>14</sub>H<sub>10</sub> (8)**

**Table S1** Selected bond distances (Å) and angles (°) for compound **8**

|                   |            |                   |            |
|-------------------|------------|-------------------|------------|
| C(1)-C(2)         | 1.393(3)   | C(7)-C(8)         | 1.395(3)   |
| C(2)-C(3)         | 1.386(3)   | C(8)-C(9)         | 1.382(4)   |
| C(3)-C(4)         | 1.369(4)   | C(9)-C(10)        | 1.379(4)   |
| C(4)-C(5)         | 1.375(4)   | C(10)-C(11)       | 1.379(4)   |
| C(5)-C(6)         | 1.371(4)   | C(11)-C(12)       | 1.372(4)   |
| C(1)-C(6)         | 1.383(4)   | C(7)-C(12)        | 1.378(4)   |
| C(1)-C(13)        | 1.506(3)   | C(7)-C(13)        | 1.507(3)   |
| C(2)-C(14)        | 1.500(3)   | C(8)-C(14)        | 1.507(3)   |
| N(1)-C(13)        | 1.489(3)   | N(2)-C(14)        | 1.498(3)   |
| N(1)-C(15)        | 1.425(3)   | N(2)-C(27)        | 1.445(3)   |
| N(1)-H(1)         | 0.858(17)  | N(2)-H(2)         | 0.850(17)  |
| C(15)-C(16)       | 1.397(3)   | C(27)-C(28)       | 1.409(4)   |
| C(16)-C(17)       | 1.386(4)   | C(28)-C(29)       | 1.383(4)   |
| C(17)-C(18)       | 1.376(4)   | C(29)-C(30)       | 1.359(4)   |
| C(18)-C(19)       | 1.366(4)   | C(30)-C(31)       | 1.371(4)   |
| C(19)-C(20)       | 1.384(4)   | C(31)-C(32)       | 1.385(4)   |
| C(15)-C(20)       | 1.407(3)   | C(27)-C(32)       | 1.396(4)   |
| C(16)-C(21)       | 1.521(3)   | C(28)-C(33)       | 1.509(4)   |
| C(21)-C(22)       | 1.523(4)   | C(33)-C(34)       | 1.513(4)   |
| C(21)-C(23)       | 1.518(4)   | C(33)-C(35)       | 1.522(4)   |
| C(20)-C(24)       | 1.516(4)   | C(32)-C(36)       | 1.513(4)   |
| C(24)-C(25)       | 1.523(4)   | C(36)-C(37)       | 1.514(4)   |
| C(24)-C(26)       | 1.531(4)   | C(36)-C(38)       | 1.522(4)   |
| C(3)-C(2)-C(1)    | 119.2(2)   | C(9)-C(8)-C(7)    | 119.4(2)   |
| C(4)-C(3)-C(2)    | 121.2(3)   | C(10)-C(9)-C(8)   | 120.9(3)   |
| C(3)-C(4)-C(5)    | 119.4(3)   | C(9)-C(10)-C(11)  | 119.3(3)   |
| C(6)-C(5)-C(4)    | 120.2(3)   | C(12)-C(11)-C(10) | 120.4(3)   |
| C(5)-C(6)-C(1)    | 121.1(3)   | C(11)-C(12)-C(7)  | 120.8(3)   |
| C(6)-C(1)-C(2)    | 118.8(2)   | C(12)-C(7)-C(8)   | 119.3(2)   |
| C(2)-C(1)-C(13)   | 120.0(2)   | C(8)-C(7)-C(13)   | 119.7(2)   |
| C(6)-C(1)-C(13)   | 121.2(2)   | C(12)-C(7)-C(13)  | 121.0(2)   |
| C(1)-C(2)-C(14)   | 119.5(2)   | C(7)-C(8)-C(14)   | 119.5(2)   |
| C(3)-C(2)-C(14)   | 121.3(2)   | C(9)-C(8)-C(14)   | 121.2(2)   |
| C(1)-C(13)-C(7)   | 111.6(2)   | C(2)-C(14)-C(8)   | 111.19(19) |
| N(1)-C(13)-C(1)   | 109.11(19) | N(2)-C(14)-C(2)   | 110.93(19) |
| N(1)-C(13)-C(7)   | 113.6(2)   | N(2)-C(14)-C(8)   | 107.88(19) |
| C(16)-C(15)-N(1)  | 121.6(2)   | C(28)-C(27)-N(2)  | 120.4(2)   |
| C(20)-C(15)-N(1)  | 118.2(2)   | C(32)-C(27)-N(2)  | 118.7(2)   |
| C(17)-C(16)-C(15) | 118.4(2)   | C(29)-C(28)-C(27) | 117.6(3)   |

|                   |            |                   |            |
|-------------------|------------|-------------------|------------|
| C(18)-C(17)-C(16) | 121.6(3)   | C(30)-C(29)-C(28) | 122.4(3)   |
| C(19)-C(18)-C(17) | 119.5(3)   | C(29)-C(30)-C(31) | 119.3(3)   |
| C(18)-C(19)-C(20) | 121.4(3)   | C(30)-C(31)-C(32) | 121.8(3)   |
| C(19)-C(20)-C(15) | 118.7(2)   | C(31)-C(32)-C(27) | 118.1(3)   |
| C(16)-C(15)-C(20) | 120.2(2)   | C(32)-C(27)-C(28) | 120.8(2)   |
| C(15)-C(16)-C(21) | 123.2(2)   | C(27)-C(28)-C(33) | 122.7(2)   |
| C(17)-C(16)-C(21) | 118.3(2)   | C(29)-C(28)-C(33) | 119.7(2)   |
| C(15)-C(20)-C(24) | 122.6(2)   | C(27)-C(32)-C(36) | 121.8(2)   |
| C(19)-C(20)-C(24) | 118.6(2)   | C(31)-C(32)-C(36) | 120.0(3)   |
| C(16)-C(21)-C(22) | 111.0(2)   | C(28)-C(33)-C(34) | 112.0(3)   |
| C(23)-C(21)-C(16) | 112.3(2)   | C(28)-C(33)-C(35) | 111.6(3)   |
| C(23)-C(21)-C(22) | 110.7(2)   | C(34)-C(33)-C(35) | 109.4(3)   |
| C(20)-C(24)-C(25) | 112.5(3)   | C(32)-C(36)-C(37) | 110.4(3)   |
| C(20)-C(24)-C(26) | 111.1(2)   | C(32)-C(36)-C(38) | 114.0(3)   |
| C(25)-C(24)-C(26) | 109.9(3)   | C(37)-C(36)-C(38) | 110.4(3)   |
| C(15)-N(1)-C(13)  | 116.58(19) | C(27)-N(2)-C(14)  | 115.94(19) |
| C(13)-N(1)-H(1)   | 108(2)     | C(14)-N(2)-H(2)   | 103(2)     |
| C(15)-N(1)-H(1)   | 112(2)     | C(27)-N(2)-H(2)   | 112(2)     |

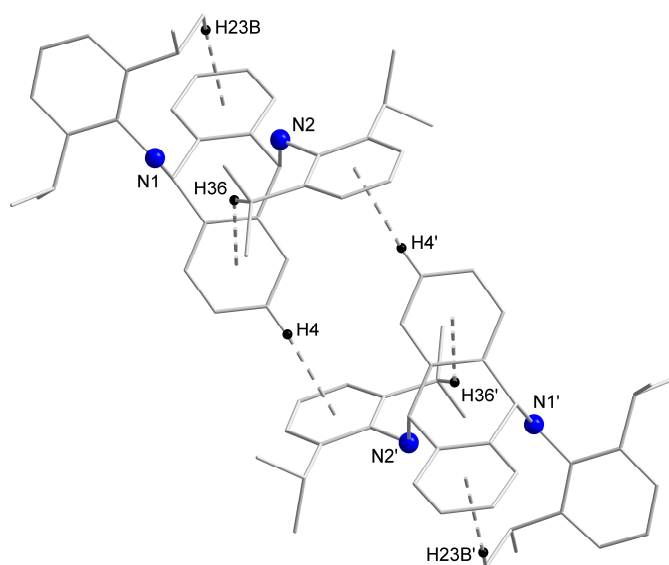

**Figure S3.** View of a dimer based on C–H<sub>aryl</sub>··· $\pi$  (Ph<sub>centroid</sub>) contacts between molecules in the crystal of **8** (only hydrogen atoms involved in intra- and intermolecular contacts are shown) [symmetry equivalent atoms ( $1 - x$ ,  $1 - y$ ,  $1 - z$ ) are given by “prime”].

|                           |                                       |        |
|---------------------------|---------------------------------------|--------|
| - intramolecular distance | C(23)–H(23B)···Ph <sub>centroid</sub> | 2.86 Å |
|                           | C(36)–H(36)···Ph <sub>centroid</sub>  | 3.00 Å |
| - intermolecular distance | C(4)–H(4)···Ph <sub>centroid</sub>    | 2.86 Å |

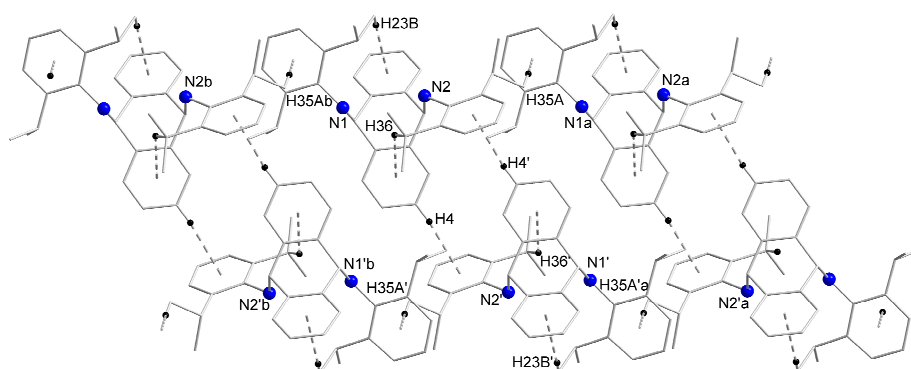

**Figure S4.** View of a ribbon-like polymer of dimers based on  $C-H_{\text{methyl}} \cdots \pi (\text{Ph}_{\text{centroid}})$  contacts in the crystal of **8** (only hydrogen atoms involved in intra- and intermolecular contacts are shown) [symmetry equivalent atoms  $(-1+x, y, z)$ ,  $(1+x, y, z)$ ,  $(1-x, 1-y, 1-z)$ ,  $(-x, 1-y, 1-z)$  and  $(0.5-x, 0.5+y, 0.5-z)$  are given by “a”, “b”, “prime”, “a prime” and “b prime”, respectively].

- inter-dimers distance  $C(35)-H(35A) \cdots \text{Ph}_{\text{centroid}}$  2.84 Å

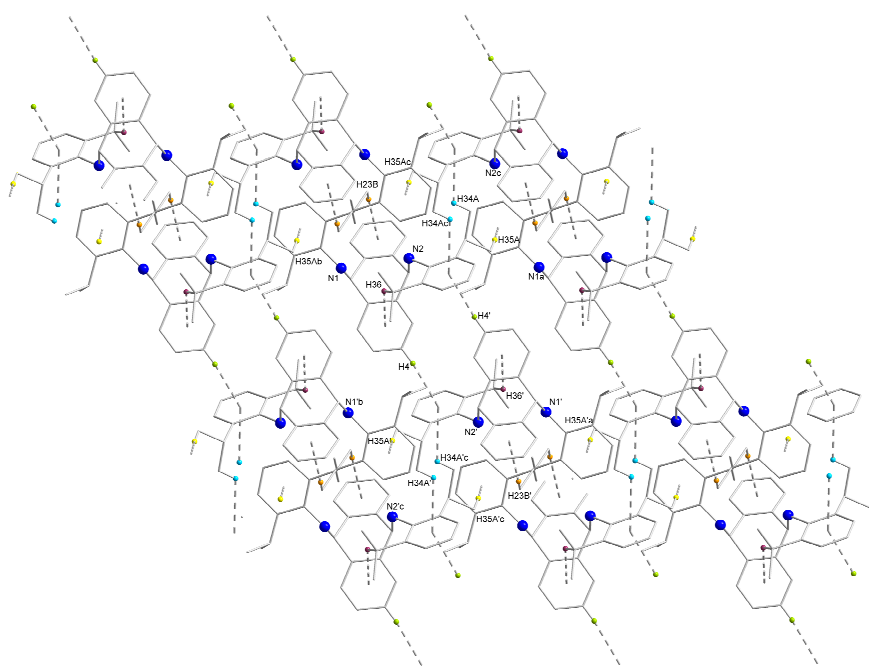

**Figure S5.** View of a layer with inter-chains  $C-H_{\text{methyl}} \cdots \pi (\text{Ph}_{\text{centroid}})$  contacts between alternating chain polymers in the crystal of **8** (only hydrogen atoms involved in intermolecular contacts are shown) [symmetry equivalent atoms  $(x, -1+y, z)$ ,  $(0.5-x, -0.5+y, 0.5-z)$ ,  $(0.5-x, 0.5+y, 0.5-z)$  and  $(0.5-x, 0.5+y, 0.5-z)$  are given by “a”, “b”, “c” and “d”, respectively].

- inter-chains distance  $C(34)-H(34A) \cdots \text{Ph}_{\text{centroid}}$  2.84 Å

[2-(PhCH<sub>2</sub>N=CH)C<sub>6</sub>H<sub>4</sub>Se]<sub>2</sub>Zn (**11**)

- the crystal contains a 1:1 mixture of  $\Lambda_{\text{Zn}}-(R_{\text{Zn}(\text{N}1)}, R_{\text{Zn}(\text{N}2)})$  and  $\Delta_{\text{Zn}}-(S_{\text{Zn}(\text{N}1)}, S_{\text{Zn}(\text{N}2)})$  isomers

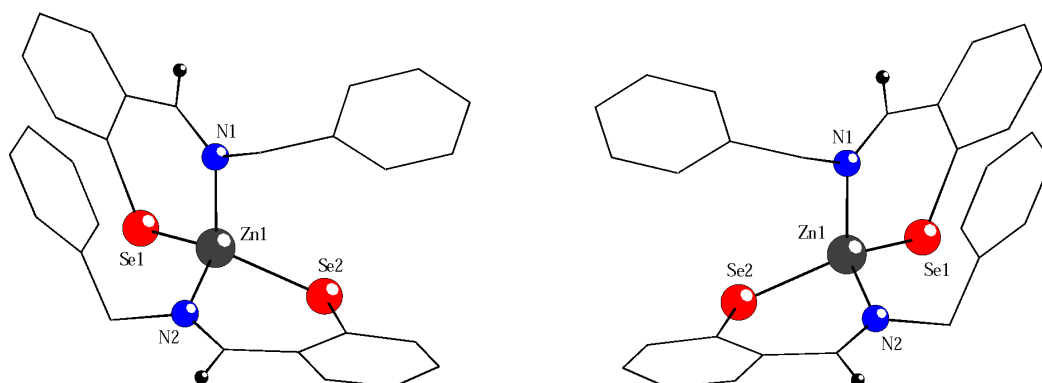

**Figure S6.** Molecular structure of  $\Lambda_{\text{Zn}}-(R_{\text{Zn}(\text{N}1)}, R_{\text{Zn}(\text{N}2)})$ -**11** isomer (*left*) and  $\Delta_{\text{Zn}}-(S_{\text{Zn}(\text{N}1)}, S_{\text{Zn}(\text{N}2)})$ -**11** isomer (*right*) in the crystal of **11** (only *imine* hydrogen atoms are shown).

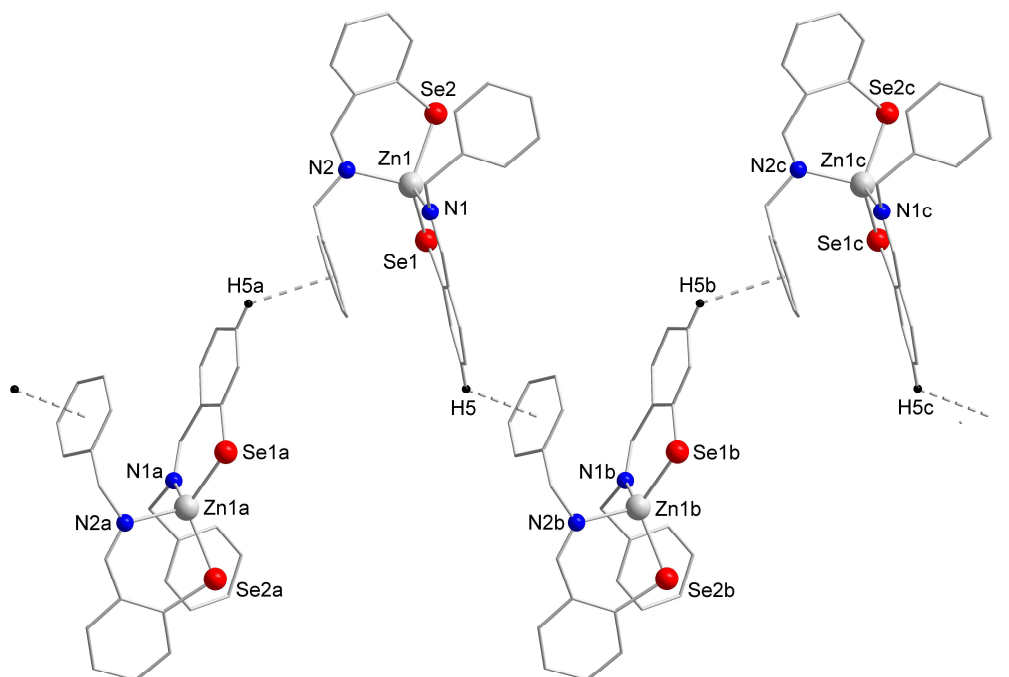

**Figure S7.** View of a chain polymer based on C–H<sub>aryl</sub>⋯π(Ph<sub>centroid</sub>) contacts between  $\Lambda_{\text{Zn}}-(R_{\text{Zn}(\text{N}1)}, R_{\text{Zn}(\text{N}2)})$ -**11** isomers in the crystal of **11** (only hydrogen atoms involved in intermolecular contacts are shown) [symmetry equivalent atoms (1.5 – x, 0.5 + y, 0.5 – z), (1.5 – x, –0.5 + y, 0.5 – z) and (x, –1 + y, z) are given by “a”, “b” and “c”, respectively].

- intermolecular distance  $\text{C}(5)\text{--H}(5)\cdots\text{Ph}_{\text{centroid}}$  2.73 Å
- no further contacts between parallel chains.



[2-(2',6'-<sup>i</sup>Pr<sub>2</sub>C<sub>6</sub>H<sub>3</sub>N=CH)C<sub>6</sub>H<sub>4</sub>Se]<sub>2</sub>Zn (12)

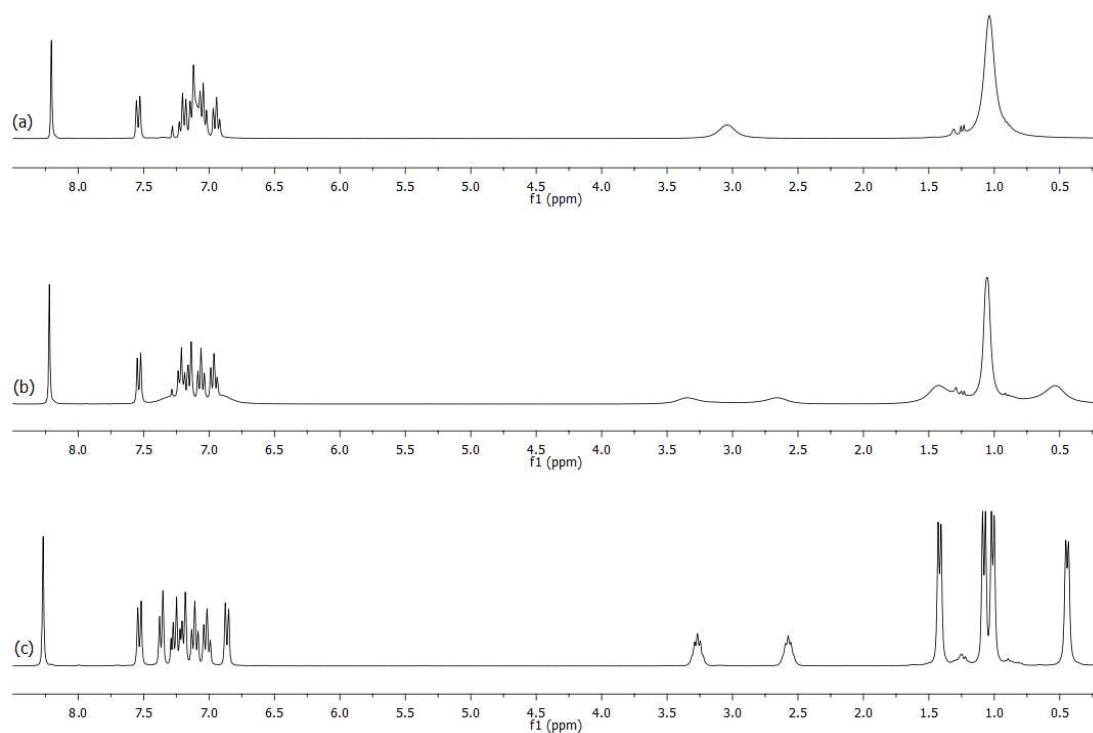

**Figure S8.** Comparison of the <sup>1</sup>H NMR (CDCl<sub>3</sub>, 300 MHz) spectra of compound **12** at (a) +50 °C, (b) +20 °C and (c) -40 °C.

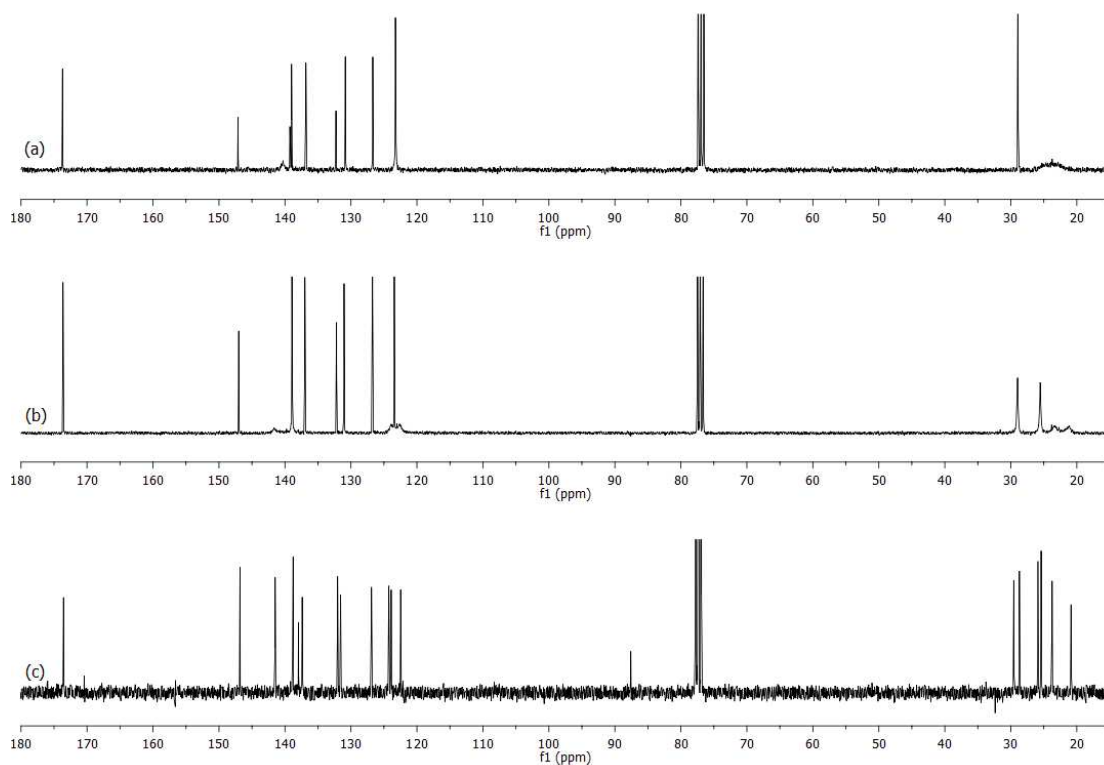

**Figure S9.** Comparison of the <sup>13</sup>C NMR (CDCl<sub>3</sub>, 300 MHz) spectra of compound **12** at (a) +50 °C, (b) +20 °C and (c) -40 °C.

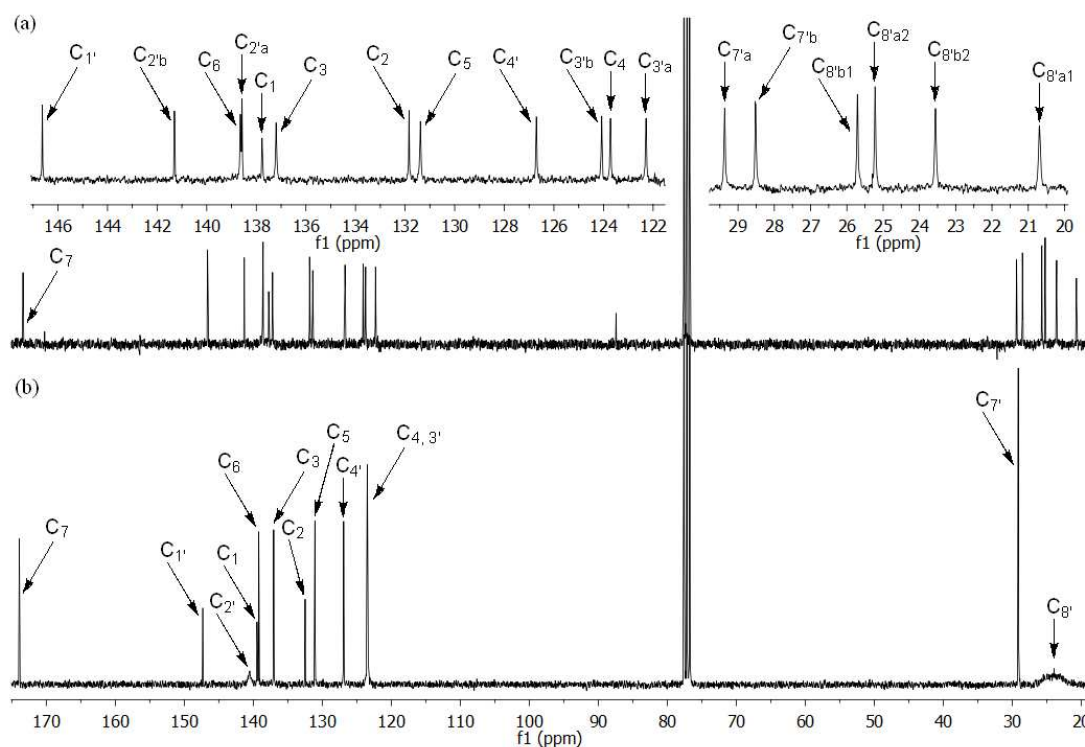

**Figure S10.** Assignments of the  $^{13}\text{C}$  resonances in the spectra ( $\text{CDCl}_3$ , 300 MHz) of compound **12** at (a)  $-40\text{ }^\circ\text{C}$ , and (b)  $+50\text{ }^\circ\text{C}$ .

- the crystal contains a 1:1 mixture of  $\Lambda_{\text{Zn}}-(R_{\text{Zn}}(\text{N}1), R_{\text{Zn}}(\text{N}1a))$  and  $\Delta_{\text{Zn}}-(S_{\text{Zn}}(\text{N}1), S_{\text{Zn}}(\text{N}1a))$  isomers

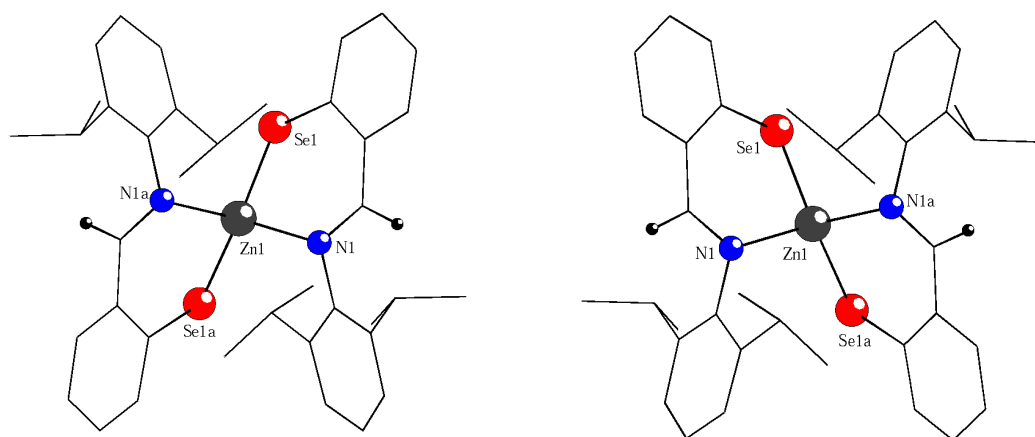

**Figure S11.** Molecular structure of  $\Lambda_{\text{Zn}}-(R_{\text{Zn}}(\text{N}1), R_{\text{Zn}}(\text{N}1a))$ -**12** isomer (left) and  $\Delta_{\text{Zn}}-(S_{\text{Zn}}(\text{N}1), S_{\text{Zn}}(\text{N}1a))$ -**12** isomer (right) in the crystal of **12** (only imine hydrogen atoms are shown).
